# Supplementary material
Source: PubMed Central journal article supplement (PMC9643635)
Supplement: NIHMS1837102-supplement-1.pdf [file NIHMS1837102-supplement-1.pdf]

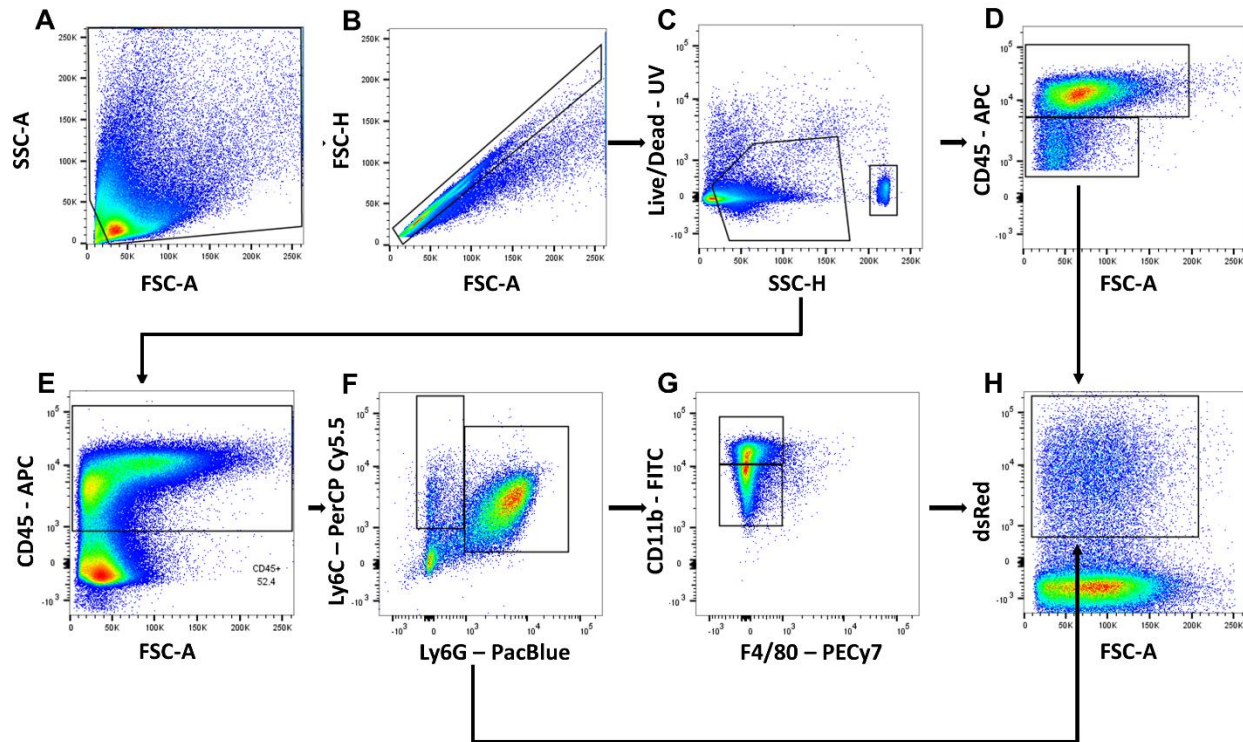

**Supplemental Figure 1. Gating strategy to quantify immune populations and dsRed signal in the brain, galea, and bone flap following *S. aureus* craniotomy infection.** From the (A) total events, (B) single cells were gated using FSC-A vs. FSC-H, followed by (C) exclusion of dead cells using SSC-H vs. Live/Dead UV and AccuCount beads (right gate). (D) Live cells were gated into CD45<sup>high</sup> leukocytes and CD45<sup>low</sup> microglia. (E) CD45<sup>high</sup> leukocytes were separated into (F) Ly6C<sup>+</sup>Ly6G<sup>-</sup> monocytes and Ly6G<sup>+</sup>Ly6C<sup>+</sup> cells, which were further classified as (G) G-MDSCs (CD11b<sup>high</sup>Ly6G<sup>+</sup>Ly6C<sup>+</sup>F4/80<sup>-</sup>) and neutrophils (CD11b<sup>low</sup>Ly6G<sup>+</sup>Ly6C<sup>+</sup>F4/80<sup>-</sup>) based on differential CD11b expression. (H) *S. aureus*-dsRed<sup>+</sup> microglia, monocytes, G-MDSCs, and neutrophils were then identified.

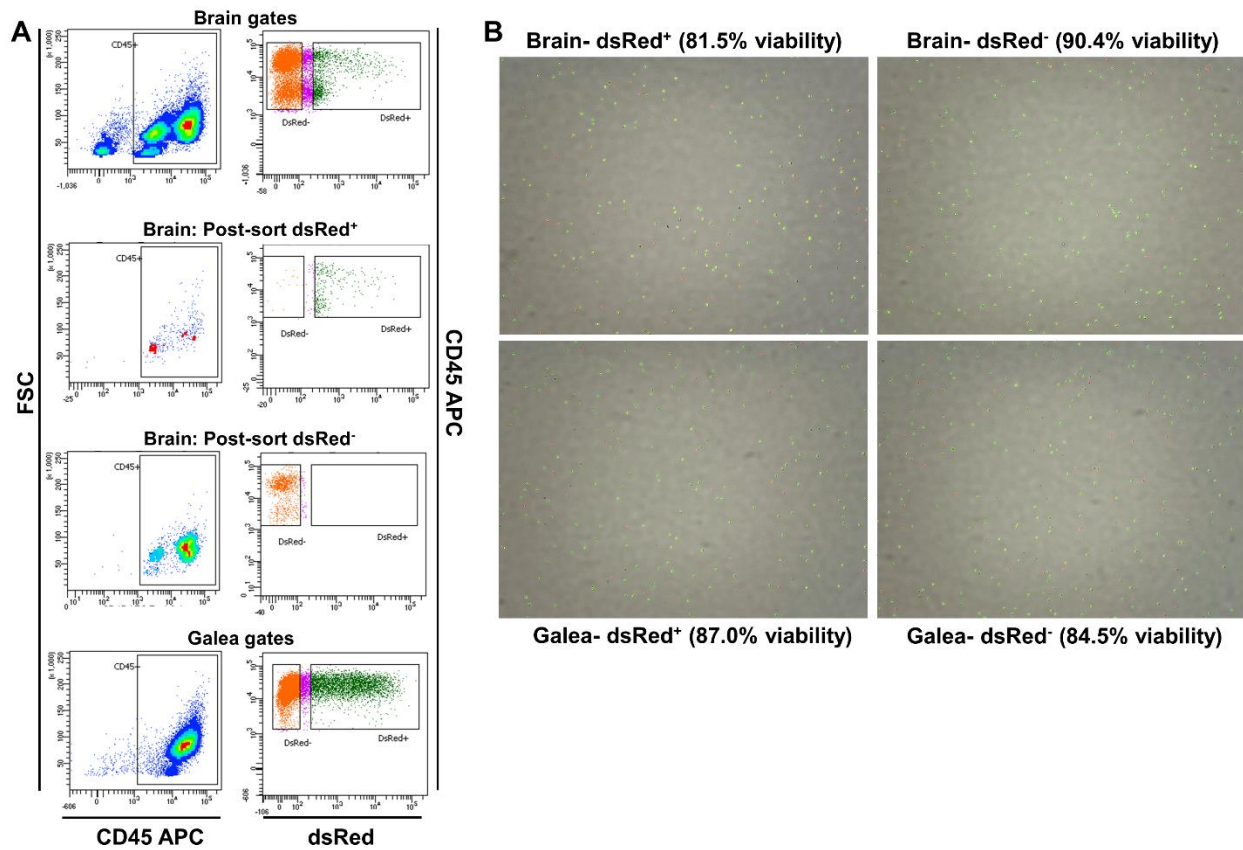

**Supplemental Figure 2. FACS parameters for acquisition of CD45<sup>+</sup> dsRed<sup>+</sup> and dsRed<sup>-</sup> cells from the brain and galea for scRNA-seq and post-sort viability.** C57BL/6J mice (n=25) were sacrificed at day 3 following craniotomy infection with a *S. aureus*-dsRed strain, whereupon dsRed<sup>+</sup> and dsRed<sup>-</sup> cells were sorted from the total CD45<sup>+</sup> population by FACS. **(A)** Gates used to capture CD45<sup>+</sup> dsRed<sup>+</sup> and dsRed<sup>-</sup> cells from the brain and galea and **(B)** post-sort viability and debris analysis, where green and red depict live vs. dead cells, respectively.

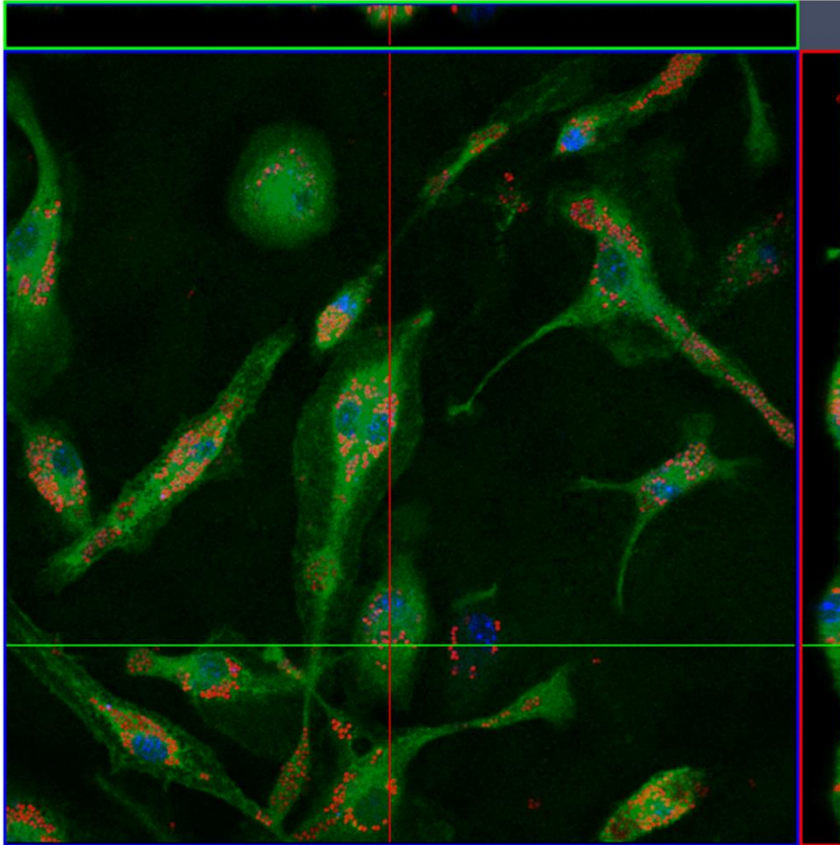

**Supplemental Figure 3. *S. aureus*-dsRed is efficiently phagocytosed by macrophages.**

Primary macrophages were labeled with CellTracker Deep Red (pseudocolored green) and Hoechst 33342 (blue) prior to live *S. aureus*-dsRed challenge at a MOI of 10:1 (bacteria:macrophage). After a 2 h incubation period phagocytosis was assessed by confocal microscopy (40x magnification).

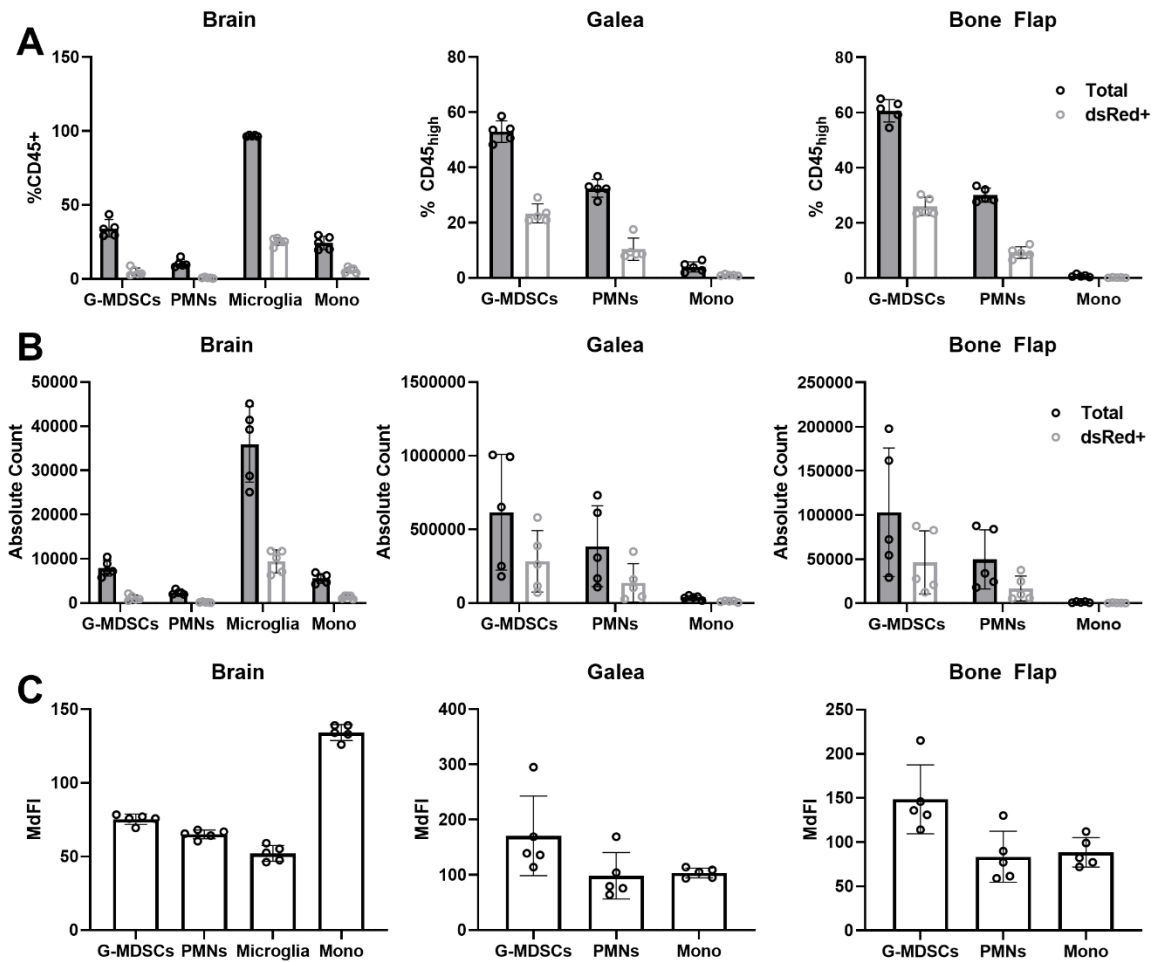

**Supplemental Figure 4. Leukocyte phagocytic activity is influenced by the local tissue environment during *S. aureus* craniotomy infection.** C57BL/6J mice (n=5) were sacrificed at day 1 following craniotomy infection with a *S. aureus*-dsRed strain, whereupon microglia and leukocyte infiltrates in the brain, galea, and bone flap were quantified by flow cytometry. **(A)** Percentages and **(B)** absolute counts of CD45<sup>+</sup> cells in the galea, brain, and bone flap expressed as the total number of cells and those that had phagocytosed *S. aureus* (dsRed<sup>+</sup>). **(C)** Median fluorescence intensity (MdFI) of dsRed<sup>+</sup> phagocytic cells.
